# Supplementary material
Source: Springer Nature journal article supplement (https://www.springermedizin.de/resource/supplementary/12865_2008_259_MOESM4_ESM.pdf/9427620)

# FITC-dextran

Medium

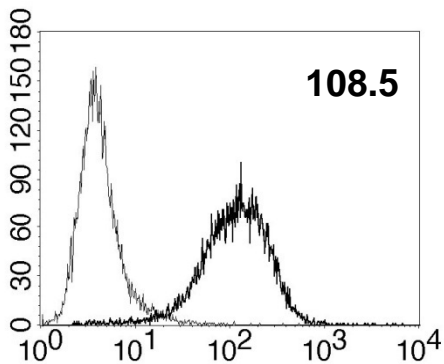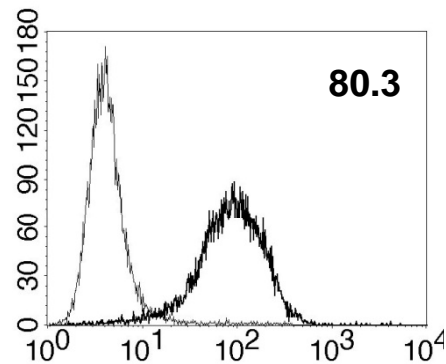

LPS

Relative cell number

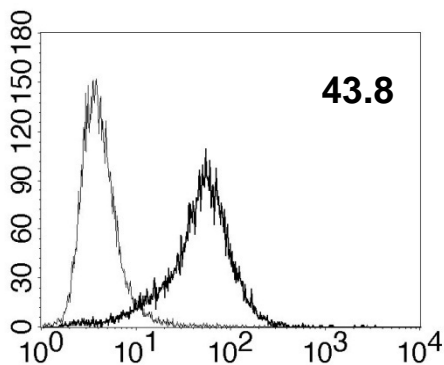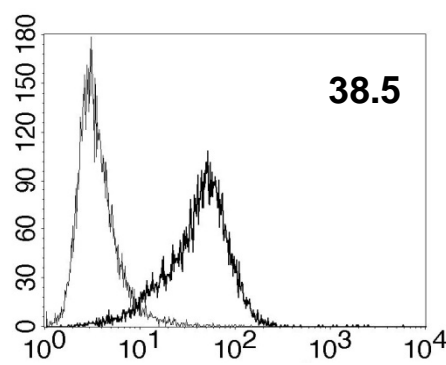

Mite

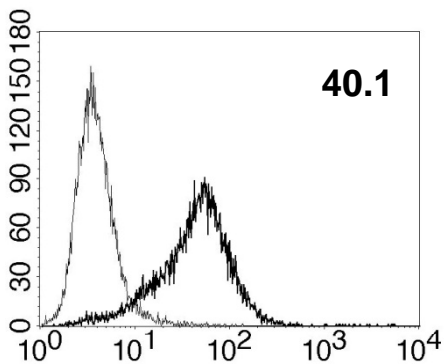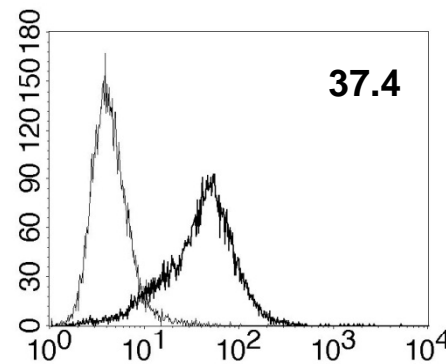

DMSO

CAPE

Supplement: MOESM4 [file 9427620]
